# Supplementary material for: Formate Dehydrogenase Improves the Resistance to Formic Acid and Acetic Acid Simultaneously in Saccharomyces cerevisiae
Source: MDPI journal article supplement (doi:10.3390/ijms23063406), 2022-03-21
Supplement: s1 [file s1]

# Formate dehydrogenase improves the resistance to formic acid and acetic acid simultaneously in *Saccharomyces cerevisiae*

Cong Du <sup>1,†</sup>, Yimin Li <sup>1,†</sup>, Ruijuan Xiang <sup>1</sup> and Wenjie Yuan <sup>1,2,\*</sup>

<sup>1</sup> School of Bioengineering, Dalian University of Technology, Dalian 116024, China; 18742515846@163.com (C.D.); yiminli@dlut.edu.cn (Y.L.); xiangruijuan@bluepha.com (R.X.)

<sup>2</sup> Ningbo Research Institute, Dalian University of Technology, Ningbo 315000, China

\* Correspondence: ywj@dlut.edu.cn

† These authors contributed equally to this work.

**Table S1.** Primers of RT-PCR.

| Primer  | Sequence                  | Product size |
|---------|---------------------------|--------------|
| RCK1-F  | CACGGATGACCAAGCTCCTGTTG   | 145          |
| RCK1-R  | CGAAACCAGTTTGTGGATGGCAAC  | 145          |
| DAK2-F  | AGAAGTTGCCGAAGTTGCTCAGTC  | 80           |
| DAK2-R  | CAGGAACCGTGCAAGTATCAAGAG  | 80           |
| CTT1-F  | CTGGAGATAAGGCTGCTGAAGTGTG | 132          |
| CTT1-R  | TTGCTTGTTTCGGGTGTCATTGTTT | 132          |
| PDR15-F | TTTCGCATACAAGGGACACCAAGG  | 84           |
| PDR15-R | CCGCAATGGATACACGCTTTCCTTC | 84           |
| FDH1-F  | CGGTAGACAGGGAGTTGAAAGACG  | 114          |
| FDH1-R  | CGGTTACACAGAGCTTCAGGTTAGG | 114          |
| PMA1-F  | AAGGCTAAGGACGCTTTGACCAAG  | 92           |
| PMA1-R  | GGAGATTCGACAACGGCAGTAACC  | 92           |
| ACT1-F  | AAGTGTGATGTCGATGTCCGTAAGG | 120          |
| ACT1-R  | AGATGGAGCCAAAGCGGTGATTTC  | 120          |

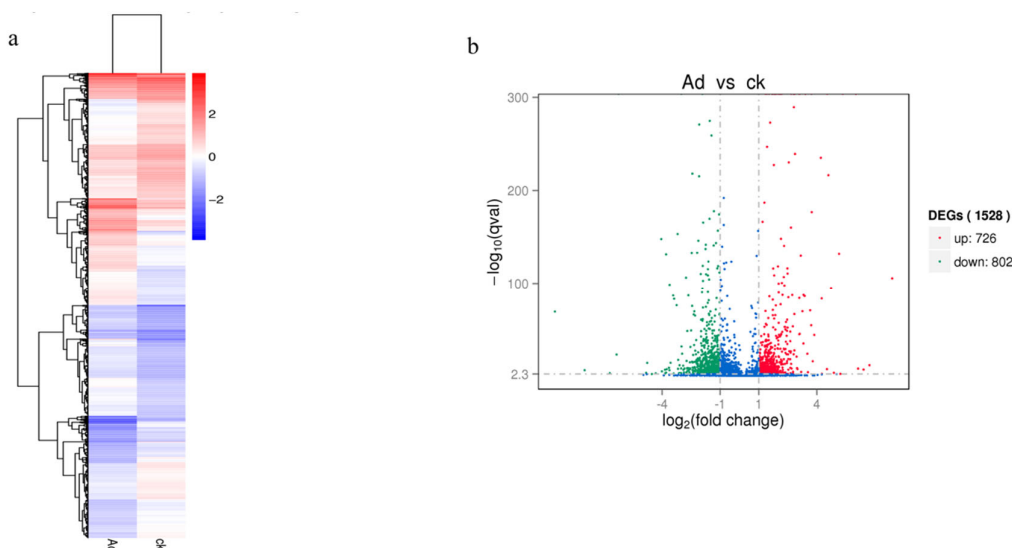

**Figure S1.** Clusters analysis and Volcano Plot of DEGs. (a) Cluster analysis of differentially expressed genes; (b) Volcano Plot, red plots were up-regulated, blue plots were down-regulated, blue plots were not significantly different.

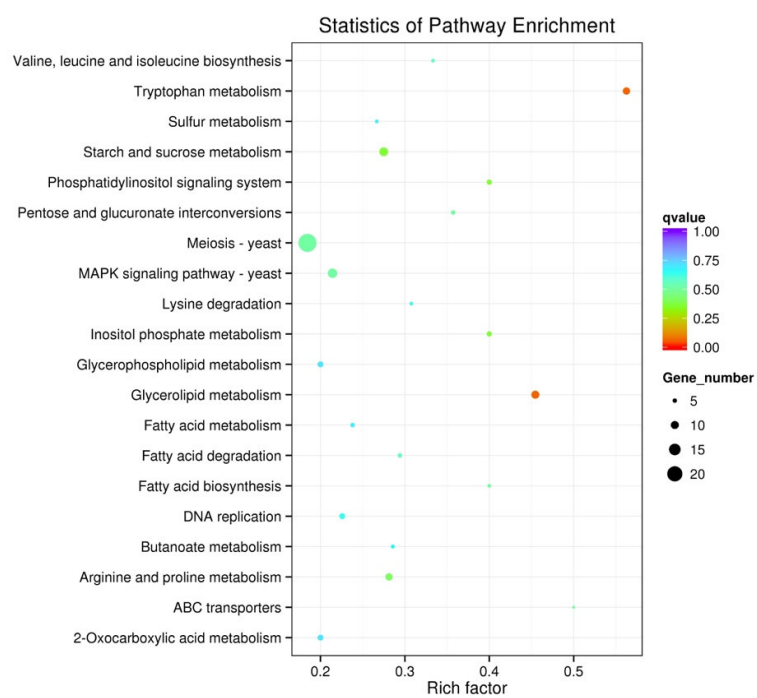

Figure S2. Statistics of pathway enrichment.
